# Supplementary material for: The Calcium Chloride Responsive Type 2C Protein Phosphatases Play Synergistic Roles in Regulating MAPK Pathways in Magnaporthe oryzae
Source: MDPI journal article supplement (doi:10.3390/jof8121287), 2022-12-08
Supplement: s1 [file s1]

## Supplementary:

**Table S1.** A list of primers used in this study.

| Name                | Sequence 5' to 3'                                  | Purpose                                                     |
|---------------------|----------------------------------------------------|-------------------------------------------------------------|
| MGG_0520<br>7 AF    | GCCAAAATGAGATACCAGAC                               | To amplify A fragment for MoPtc1 deletion                   |
| MGG_0520<br>7 AR    | AGGGAACAAAAGCTGGGTACCCAGAG<br>ACGGTTGCAGAGACAC     |                                                             |
| MGG_0520<br>7 BF    | GAATAGAGTAGATGCCGACCGCGGGT<br>TGAGAAACAGCCCGCATAG  | To amplify B fragment for MoPtc1 deletion                   |
| MGG_0520<br>7 BR    | TTCAACGACCACGAAAGC                                 |                                                             |
| MGG_0520<br>7 OF    | AAAACCACAGCCACTCCG                                 | To amplify ORF fragment for MoPtc1 deletion                 |
| MGG_0520<br>7 OR    | CGCTTGCTTGTCAAATCG                                 |                                                             |
| MGG_0520<br>7 UA    | CGGTCGGTGGCGGTAGTGAT                               | To amplify UAH fragment for testing MoPtc1 deletion mutants |
| H853                | GACAGACGTCGCGGTGAGTT                               |                                                             |
| MGG_0135<br>1 AF    | TTGTGATTCTGTCTGGTTC                                | To amplify A fragment for MoPtc2 deletion                   |
| MGG_0135<br>1 AR    | TTGACCTCCACTAGCTCCAGCCAAGCC<br>TTACGGTTGACTCCTGAG  |                                                             |
| MGG_0135<br>1 BF    | GAATAGAGTAGATGCCGACCGCGGGT<br>TTCCCCTACACCTTTGACCT | To amplify B fragment for MoPtc2 deletion                   |
| MGG_0135<br>1 BR    | GCAATCTGAATCTCGTCCC                                |                                                             |
| MGG_0135<br>1 OF    | GGTGATGATGATGAGTTCT                                | To amplify ORF fragment for MoPtc2 deletion                 |
| MGG_0135<br>1 OR    | ATCTTTGGTCCCTTTGTC                                 |                                                             |
| MGG_0135<br>1 UA    | CATCTTTCCGAGGTGGCG                                 | To amplify UAH fragment for testing MoPtc2 deletion mutants |
| H853                | GACAGACGTCGCGGTGAGTT                               |                                                             |
| MGG_0520<br>7 Com-F | GAACAAAAGCTGGGTGAGAGGAGCG<br>CGTTTT                | To amplify Ptc1 complementation fragment                    |

|          |                             |                                  |
|----------|-----------------------------|----------------------------------|
| MGG_0520 | CTGCAGGCATGCAAGTTGAAGATGTGG |                                  |
| 7 Com-R  | CCGGTT                      |                                  |
| MGG_0135 | GAACAAAAGCTGGGTGTCGCAATACT  |                                  |
| 1 Com-F  | CGGTCTT                     | To amplify Ptc2 complementation  |
| MGG_0135 | CTGCAGGCATGCAAGGACCTTGATATC | fragment                         |
| 1 Com-R  | CTCGT                       |                                  |
| MoPTC1   | GTACCAGATTACGCTCATATGATGTTT |                                  |
| AD-F     | GGCGGCTCCTC                 | For making Ptc1-AD construct of  |
| MoPTC1   | ATGCCCACCCGGGTGGAATTCTTATGA | yeast two hybrid                 |
| AD-R     | AGATGTGGCCGGTT              |                                  |
| MoPTC1   | TCAGAGGAGGACCTGCATATGATGTTT |                                  |
| BD-F     | GGCGGCTCCTC                 | For making Ptc1-BD construct of  |
| MoPTC1   | TCGACGGATCCCCGGGAATTCTTATGA | yeast two hybrid                 |
| BD-R     | AGATGTGGCCGGTT              |                                  |
| MoNBP1   | GTACCAGATTACGCTCATATGATGTCT |                                  |
| AD-F     | CGCGCCAATCC                 | For making Nbp1-AD construct of  |
| MoNBP1   | ATGCCCACCCGGGTGGAATTCTTACCG | yeast two hybrid                 |
| AD-R     | CATAATTTCCTGG               |                                  |
| MoPMK1   | TCAGAGGAGGACCTGCATATGATGTCT |                                  |
| BD-F     | CGCGCCAATCC                 | For making Pmk1-BD construct of  |
| MoPMK1   | TCGACGGATCCCCGGGAATTCTTACCG | yeast two hybrid                 |
| BD-R     | CATAATTTCCTGG               |                                  |
| MoOSM1   | GTACCAGATTACGCTCATATGATGGCG |                                  |
| AD-F     | GAATTCGTGCG                 | For making Osm1-AD construct of  |
| MoOSM1   | ATGCCCACCCGGGTGGAATTCTTATTG | yeast two hybrid                 |
| AD-R     | GCCGGTAAACT                 |                                  |
| MoOSM1   | TCAGAGGAGGACCTGCATATGATGGC  |                                  |
| BD-F     | GGAATTCGTGCG                | For making Osm1-BD construct of  |
| MoOSM1   | TCGACGGATCCCCGGGAATTCTTATTG | yeast two hybrid                 |
| BD-R     | GCCGGTAAACT                 |                                  |
|          | GAATAGAGTAGATGCCGACCGCGGGT  | To amplify AH fragment for gene  |
| HG-F     | T                           | deletion                         |
|          | TTGACCTCCACTAGCTCCAGCCAAGCC | To amplify HB fragment for gene  |
| HG-R     |                             | deletion                         |
| MGG_0520 | GCCAAAATGAGATACCAGAC        | To amplify A fragment for double |
| 7 A2F    |                             | knocking out                     |

|            |                             |                                                          |
|------------|-----------------------------|----------------------------------------------------------|
| MGG_0520   | GGAAATTGTAAGCGTTAATCTAGAGCG |                                                          |
| 7 A2R      | CGGTTGCAGAGACAC             |                                                          |
| MGG_0520   | GCATTCTGGGTAAACGACTCATAGGAG |                                                          |
| 7 BF       | GAGAAACAGCCCGCATAG          | To amplify A fragment for double knocking out            |
| MGG_0520   | TTCAACGACCACGAAAGC          |                                                          |
| 7 BR       |                             |                                                          |
| MoPTC1     | CATCCCTATACGACCGAAACTG      |                                                          |
| QF         |                             | For quantitative real-time PCR                           |
| MoPTC1     | CCGCTGGGTCTTCGATATTT        |                                                          |
| QR         |                             |                                                          |
| MoPTC2     | CGACAGAGGACCAGACAAATAA      |                                                          |
| QF         |                             | For quantitative real-time PCR                           |
| MoPTC2     | TCACAGCAGCGTCAATGT          |                                                          |
| QR         |                             |                                                          |
| Tubulin QF | TCGACAGCAATGGAGTTTAC        | For quantitative real-time PCR (as a internal reference) |
| Tubulin QR | AGCACCAGACTGACCGAAGAC       |                                                          |

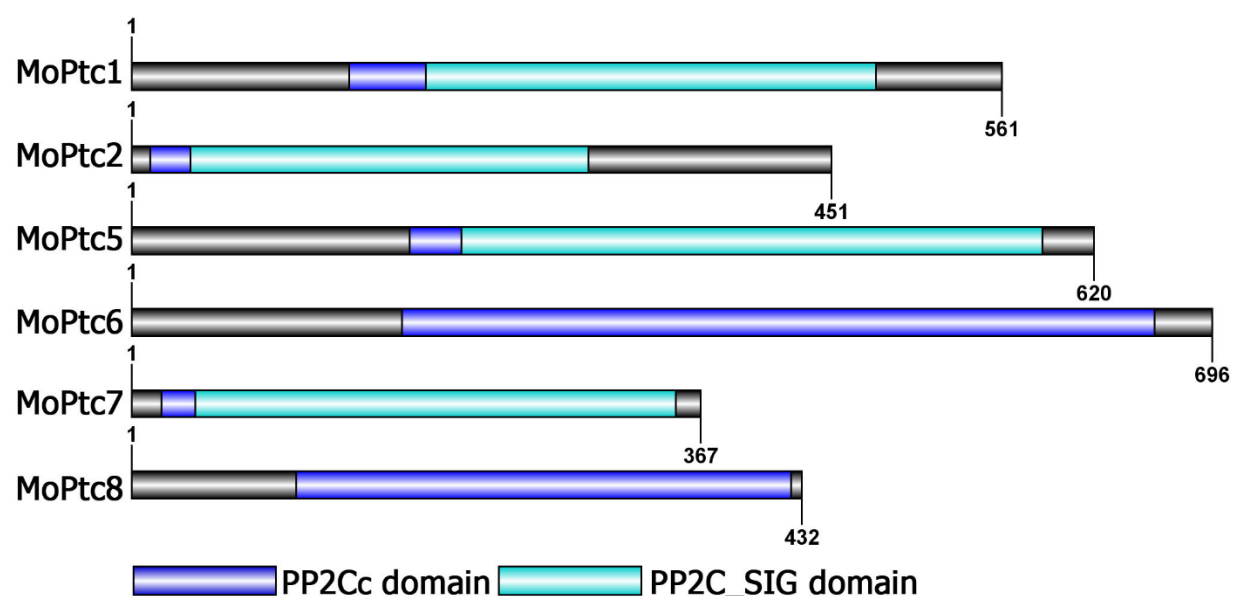

Figure S1. Domain architecture of type 2C protein phosphatases in *Magnaporthe oryzae*.

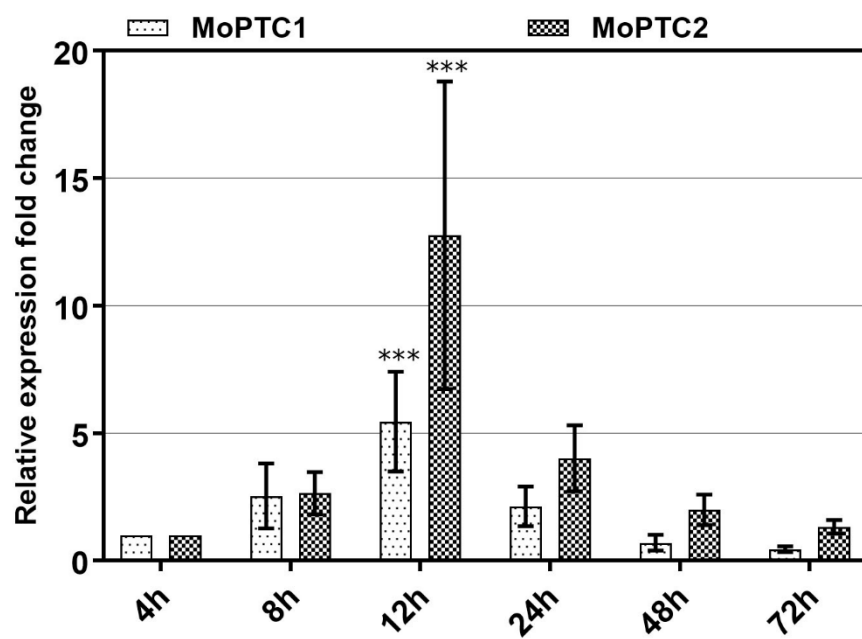

Figure S2. In planta expression pattern of MoPTC1 and MoPTC2, at 4, 8, 12, 24, 48 and 72 h of infection. The triple asterisks denotes adjusted  $p$  value of 0.0007.

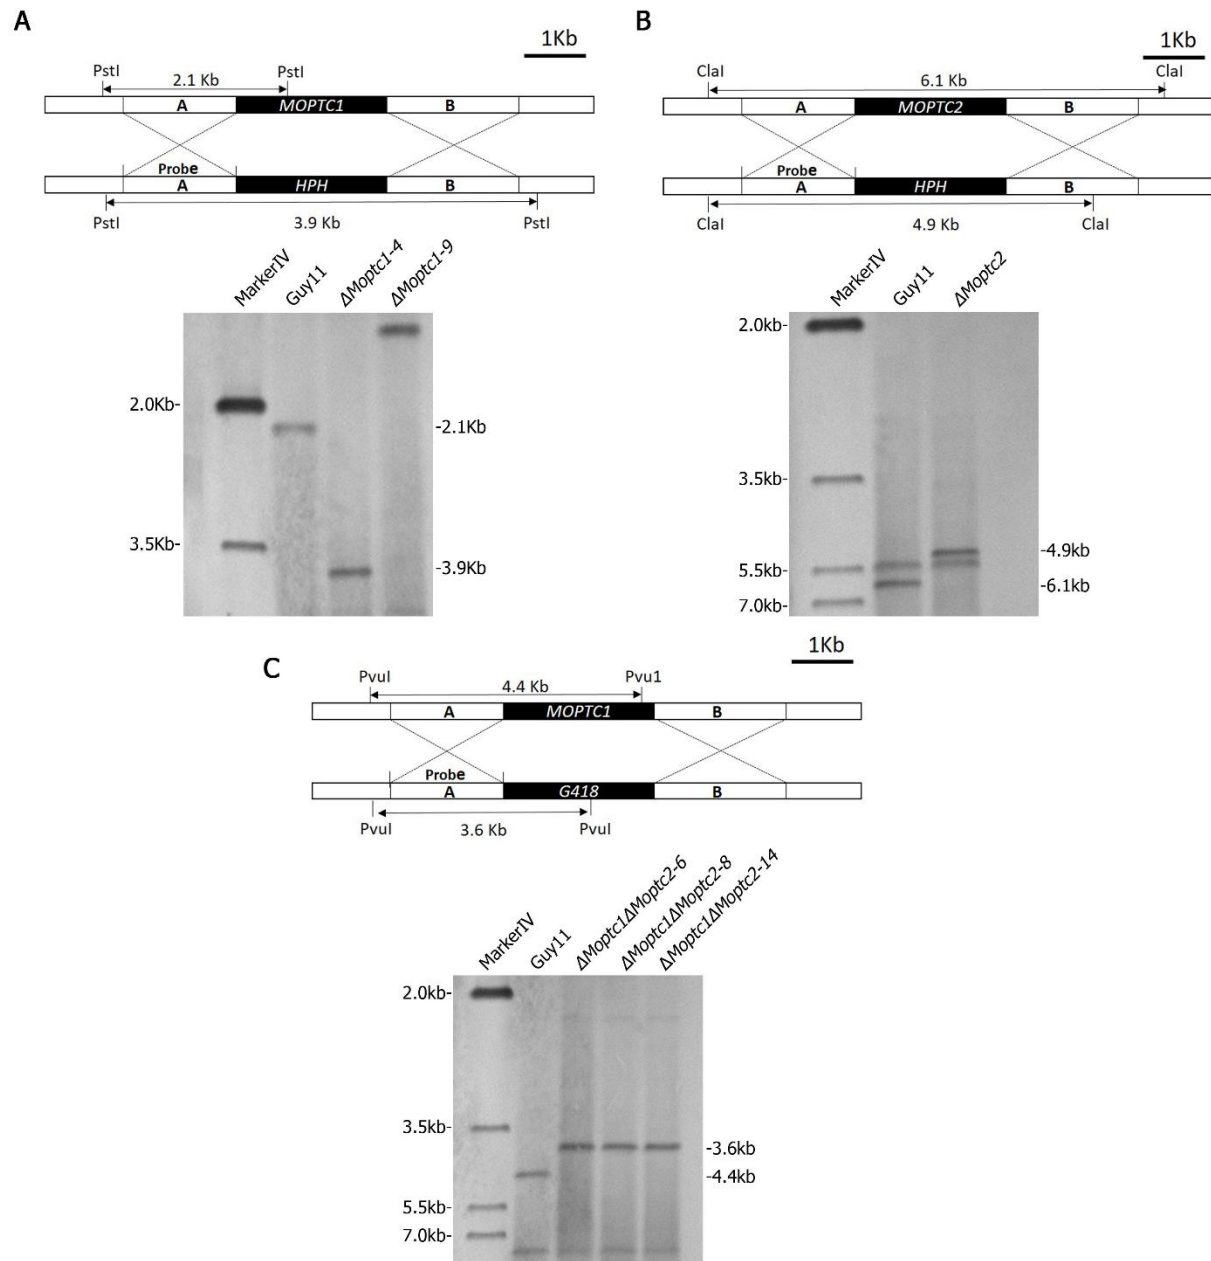

Figure S3. Targeted gene deletion for  $\Delta Moptc1$ ,  $\Delta Moptc2$ , and  $\Delta Moptc1\Delta Moptc2$  in *M. oryzae*.
